# Supplementary material for: Developing microwave-assisted ionic liquid microextraction for the detection and tracking of hydrophobic pesticides in complex environmental matrices
Source: Royal Society of Chemistry journal article supplement (doi:10.1039/c3ra41139g), 2013-01-01
Supplement: c3ra41139g.pdf [file c3ra41139g.pdf]

This journal is © The Royal Society of Chemistry 2013

ELECTRONIC SUPPLEMENTARY INFORMATION (ESI)

## Developing microwave-assisted ionic liquid microextraction for the detection and tracking of hydrophobic pesticides in complex environmental matrices

Jing Wang,<sup>a</sup> Jian Xiong,<sup>b</sup> Gary A. Baker,<sup>b</sup> Renee D. JiJi<sup>b</sup> and Sheila N. Baker<sup>\*a</sup>

<sup>a</sup> Department of Chemical Engineering, University of Missouri–Columbia, Columbia, MO 65211 USA.

<sup>b</sup> Department of Chemistry, University of Missouri–Columbia, Columbia, MO 65211 USA.

\* Corresponding author. E-mail: [bakershei@missouri.edu](mailto:bakershei@missouri.edu)

**Table S1** Pyrethroid retention times observed under our HPLC experimental conditions<sup>a</sup>

| Pyrethroid | Retention time (min) |                  |                  |
|------------|----------------------|------------------|------------------|
|            | Peak 1               | Peak 2           | Peak 3           |
| ALLE       | 11                   |                  |                  |
| CYPE       | 24                   | 9.2 <sup>b</sup> | 6.4 <sup>b</sup> |
| PERM       | 27                   | 31               |                  |

<sup>a</sup> The mobile phase consisted of a 70:30 (v/v) mixture of acetonitrile:water. <sup>b</sup> These peaks are thought to arise from CYPE degradation products.

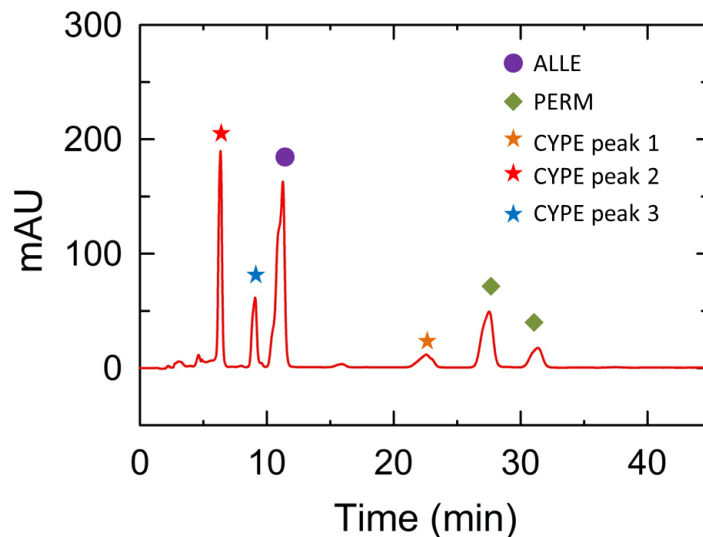

**Fig. S1** HPLC chromatogram of pyrethroids (each present at a concentration of 25 mg/L) using acetonitrile-water (70:30, v/v) as the mobile phase at a flow rate of 1 mL/min and a column temperature of 25 °C. CYPE peaks 2 and 3 are believed to originate from degradation of the parent CYPE which in turn elutes as CYPE peak 1.

This journal is © The Royal Society of Chemistry 2013

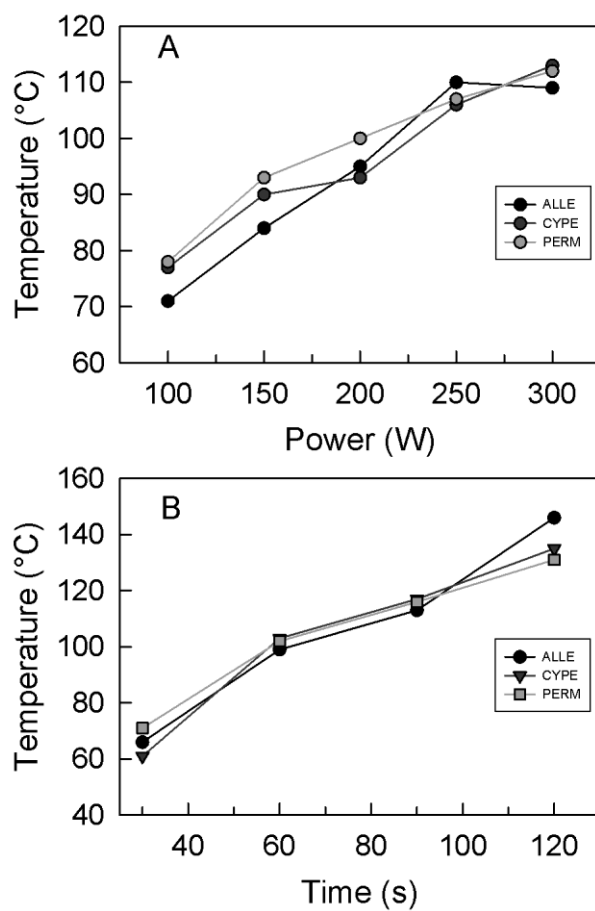

**Fig. S2** (A) Solution temperature following 60 s of microwave irradiation at various powers. (B) Solution temperatures resulting from microwave heating @200 W for different durations. For both panels, the pyrethroid concentrations were 25 mg/L and the IL used was  $[N_{8881}][Tf_2N]$ .

This journal is © The Royal Society of Chemistry 2013

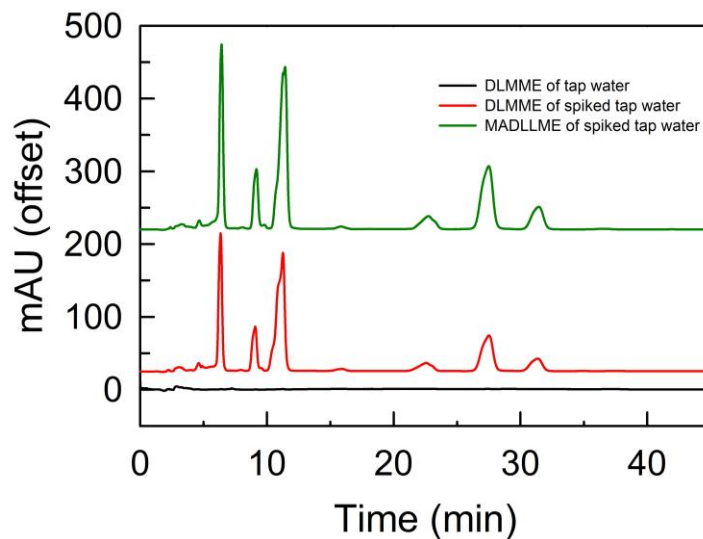

**Fig. S3** Typical chromatograms after DLLME of prepared **tap water** (black profile), DLLME of tap water spiked with pyrethroids (red), and MADLLME of tap water spiked with pyrethroids (green). The pyrethroid concentrations used were 25 mg/L and the IL tested here was  $[N_{8881}][Tf_2N]$ . For MADLLME, the microwave conditions followed were 200 W of power for a duration of 60 s.

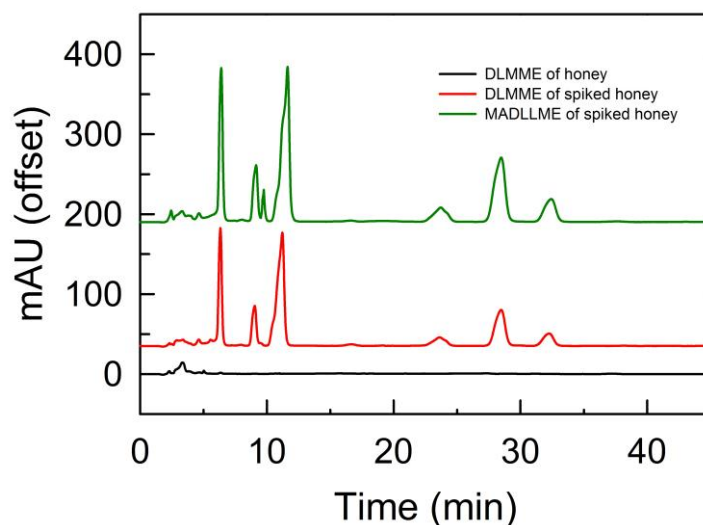

**Fig. S4** Typical chromatograms after DLLME of prepared **honey** (black curve), DLLME of honey spiked with pyrethroids (red), and MADLLME of honey spiked with pyrethroids (green). The pyrethroid concentrations used were 25 mg/L each and the IL tested here was  $[N_{8881}][Tf_2N]$ . For MADLLME, the microwave conditions followed were 200 W of power for a duration of 60 s.

This journal is © The Royal Society of Chemistry 2013

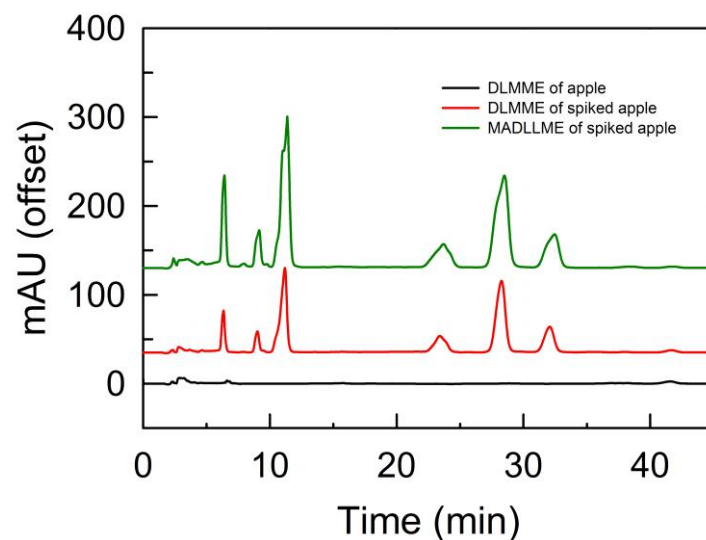

**Fig. S5** Typical chromatograms after DLLME of prepared **apple** (black curve), DLLME of apple spiked with pyrethroids (red line), and MADLLME of apple spiked with pyrethroids (green). The pyrethroid concentrations used were 25 mg/L each and the IL tested here was  $[N_{8881}][Tf_2N]$ . For MADLLME, the microwave conditions followed were 200 W of power for a duration of 60 s.

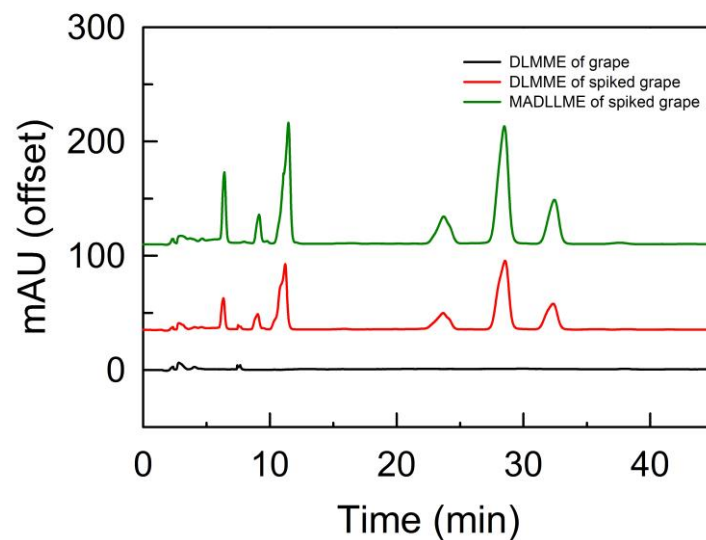

**Fig. S6** Typical chromatograms after DLLME of prepared **grape** (black profile), DLLME of grape spiked with pyrethroids (red line), and MADLLME of grape spiked with pyrethroids (green). The pyrethroid concentrations used were 25 mg/L each and the IL tested here was  $[N_{8881}][Tf_2N]$ . For MADLLME, the microwave conditions followed were 200 W of power for a duration of 60 s.

This journal is © The Royal Society of Chemistry 2013

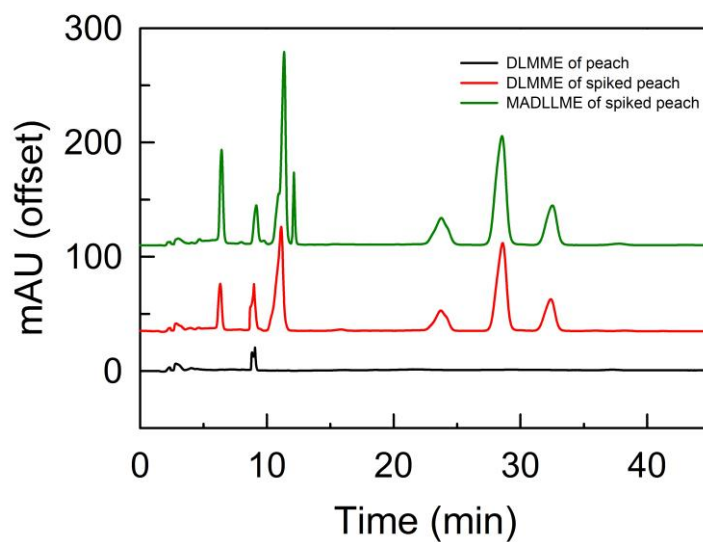

**Fig. S7** Typical chromatograms following DLLME of prepared **peach** (black line), DLLME of peach spiked with pyrethroids (red line), and MADLLME of peach spiked with pyrethroids (green profile). The pyrethroid concentrations were 25 mg/L and the IL employed was  $[N_{8881}][Tf_2N]$ . For MADLLME, the microwave power was 200 W for a microwave time 60 s.
